# Supplementary material for: Schizochytrium sp. (T18) Oil as a Fish Oil Replacement in Diets for Juvenile Rainbow Trout (Oncorhynchus mykiss): Effects on Growth Performance, Tissue Fatty Acid Content, and Lipid-Related Transcript Expression
Source: MDPI journal article supplement (doi:10.3390/ani11041185), 2021-04-20
Supplement: s1 [file s1]

## Supplementary Information

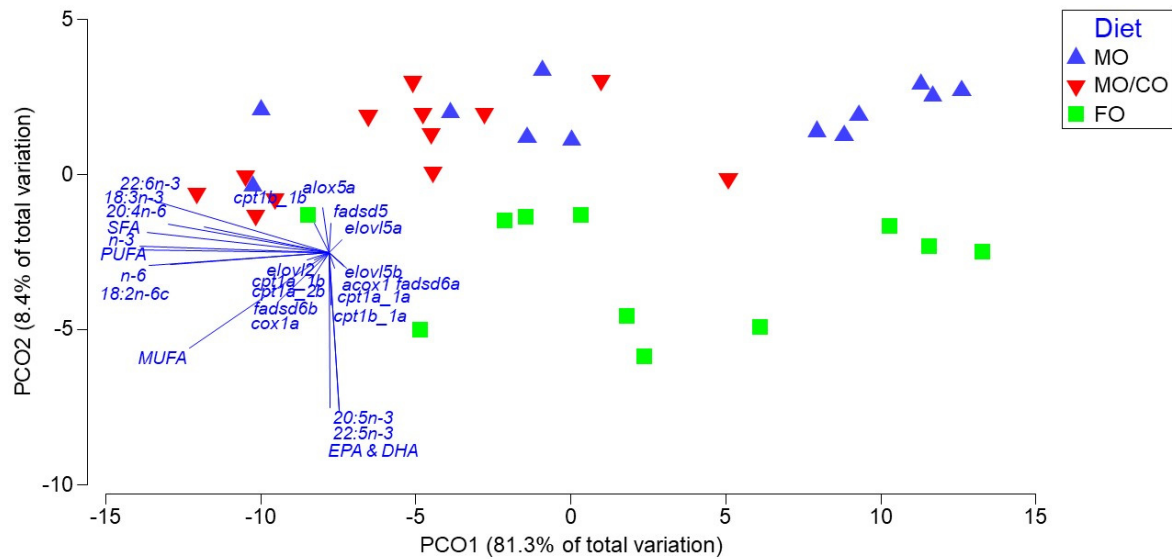

**Supplementary Figure S1.** Principal coordinate ordination plot relating individual fatty acid profiles with relative expression of targeted transcripts from liver of rainbow trout fed either the fish oil (FO) control diet, microbial oil/camelina oil (MO/CO) diet, or the microbial oil (MO) diet.

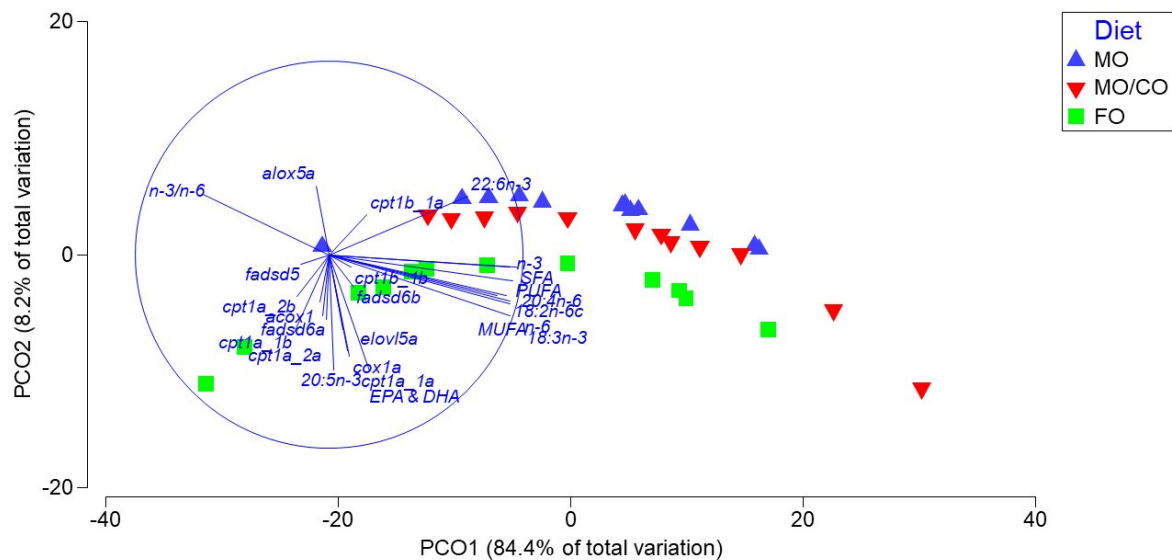

**Supplementary Figure S2.** Principal coordinate ordination plot relating individual fatty acid profiles with relative expression of targeted transcripts from muscle of rainbow trout fed either the fish oil (FO) control diet, microbial oil/camelina oil (MO/CO) diet, or the microbial oil (MO) diet.

**Supplementary Table S1.** Correlation analyses (Pearson correlation coefficient, R) comparing relationships among transcript expression (RQ values) of targeted transcripts from the study with relevant n-3 and n-6 PUFA in liver and muscle.

| Transcript     | Fatty Acid | Liver     |         | Muscle    |         |
|----------------|------------|-----------|---------|-----------|---------|
|                |            | Pearson R | p-Value | Pearson R | p-Value |
| <i>elovl2</i>  | DHA        | 0.0573    | 0.744   |           |         |
|                | EPA        | -0.0992   | 0.571   |           |         |
|                | ARA        | -0.0095   | 0.957   |           |         |
|                | ALA        | 0.0215    | 0.903   |           |         |
|                | LNA        | 0.157     | 0.369   |           |         |
|                | n-3        | 0.0235    | 0.894   |           |         |
|                | n-6        | 0.0587    | 0.737   |           |         |
|                | 18:4n-3    | 0.0552    | 0.753   |           |         |
|                | 20:3n-3    | -0.108    | 0.535   |           |         |
|                | 22:5n-3    | -0.174    | 0.316   |           |         |
|                | 18:3n-6    | 0.250     | 0.147   |           |         |
|                | 20:3n-6    | 0.156     | 0.372   |           |         |
|                |            |           |         |           |         |
| <i>elovl5a</i> | DHA        | 0.000979  | 0.996   | 0.00345   | 0.984   |
|                | EPA        | -0.150    | 0.389   | 0.103     | 0.552   |
|                | ARA        | 0.0264    | 0.881   | 0.136     | 0.429   |
|                | ALA        | -0.302    | 0.0781  | 0.287     | 0.0901  |
|                | LNA        | -0.181    | 0.297   | 0.237     | 0.165   |
|                | n-3        | -0.0747   | 0.670   | 0.168     | 0.327   |
|                | n-6        | -0.113    | 0.517   | 0.235     | 0.168   |
|                | 18:4n-3    | -0.108    | 0.538   | 0.0933    | 0.588   |
|                | 20:3n-3    | -0.0799   | 0.648   | 0.308     | 0.0673  |
|                | 22:5n-3    | -0.156    | 0.372   | 0.104     | 0.548   |
|                | 18:3n-6    | 0.140     | 0.424   | -0.0100   | 0.954   |
|                | 20:3n-6    | -0.000124 | 0.999   | 0.177     | 0.301   |
|                |            |           |         |           |         |
| <i>elovl5b</i> | DHA        | -0.0707   | 0.686   |           |         |
|                | EPA        | -0.043    | 0.802   |           |         |
|                | ARA        | 0.0136    | 0.938   |           |         |
|                | ALA        | -0.174    | 0.316   |           |         |
|                | LNA        | -0.0594   | 0.735   |           |         |
|                | n-3        | -0.100    | 0.566   |           |         |
|                | n-6        | -0.0652   | 0.710   |           |         |
|                | 18:4n-3    | -0.0651   | 0.710   |           |         |
|                | 20:3n-3    | -0.0837   | 0.633   |           |         |
|                | 22:5n-3    | -0.0496   | 0.777   |           |         |
|                | 18:3n-6    | 0.216     | 0.212   |           |         |
|                | 20:3n-6    | 0.101     | 0.563   |           |         |
|                |            |           |         |           |         |
| <i>fadsd5</i>  | DHA        | 0.0448    | 0.798   | -0.101    | 0.559   |
|                | EPA        | -0.256    | 0.138   | 0.0763    | 0.658   |
|                | ARA        | 0.0882    | 0.614   | -0.0265   | 0.878   |
|                | ALA        | -0.161    | 0.355   | -0.106    | 0.540   |
|                | LNA        | -0.0531   | 0.762   | -0.0962   | 0.577   |
|                | n-3        | -0.0520   | 0.767   | -0.106    | 0.537   |
|                | n-6        | -0.0350   | 0.842   | -0.107    | 0.535   |
|                | 18:4n-3    | -0.0893   | 0.610   | -0.0456   | 0.792   |
|                | 20:3n-3    | -0.024    | 0.889   | -0.123    | 0.476   |
|                | 22:5n-3    | -0.313    | 0.0672  | 0.0200    | 0.908   |
|                | 18:3n-6    | 0.0810    | 0.644   | -0.170    | 0.323   |
|                | 20:3n-6    | -0.132    | 0.449   | -0.186    | 0.278   |
|                |            |           |         |           |         |
| <i>fadsd6a</i> | DHA        | -0.106    | 0.544   | -0.171    | 0.320   |
|                | EPA        | -0.0437   | 0.803   | 0.279     | 0.0995  |

|                |         |         |               |         |                |
|----------------|---------|---------|---------------|---------|----------------|
|                | ARA     | -0.0370 | 0.833         | 0.0566  | 0.743          |
|                | ALA     | -0.167  | 0.337         | -0.0151 | 0.930          |
|                | LNA     | -0.0481 | 0.784         | 0.00519 | 0.976          |
|                | n-3     | -0.134  | 0.442         | -0.0483 | 0.780          |
|                | n-6     | -0.0529 | 0.763         | 0.0191  | 0.912          |
|                | 18:4n-3 | -0.0393 | 0.822         | 0.277   | 0.102          |
|                | 20:3n-3 | -0.0442 | 0.801         | -0.0280 | 0.871          |
|                | 22:5n-3 | -0.107  | 0.541         | 0.239   | 0.160          |
|                | 18:3n-6 | 0.109   | 0.533         | 0.192   | 0.261          |
|                | 20:3n-6 | 0.0896  | 0.609         | 0.110   | 0.523          |
| <i>fadsd6b</i> | DHA     | 0.0571  | 0.745         | 0.00447 | 0.979          |
|                | EPA     | -0.0317 | 0.857         | 0.0368  | 0.831          |
|                | ARA     | 0.0383  | 0.827         | 0.0822  | 0.634          |
|                | ALA     | 0.117   | 0.503         | 0.350   | <b>0.0362</b>  |
|                | LNA     | 0.183   | 0.293         | 0.276   | 0.103          |
|                | n-3     | 0.0543  | 0.757         | 0.181   | 0.292          |
|                | n-6     | 0.132   | 0.448         | 0.267   | 0.116          |
|                | 18:4n-3 | 0.197   | 0.257         | 0.0778  | 0.652          |
|                | 20:3n-3 | 0.0161  | 0.927         | 0.398   | <b>0.0162</b>  |
|                | 22:5n-3 | -0.0978 | 0.576         | -0.0135 | 0.938          |
|                | 18:3n-6 | 0.214   | 0.216         | -0.0289 | 0.867          |
|                | 20:3n-6 | 0.224   | 0.196         | 0.0977  | 0.571          |
| <i>acox1</i>   | DHA     | -0.0412 | 0.814         | -0.111  | 0.518          |
|                | EPA     | 0.158   | 0.364         | 0.191   | 0.265          |
|                | ARA     | -0.0963 | 0.582         | 0.0274  | 0.874          |
| <i>cpt1a1a</i> | DHA     | -0.0515 | 0.769         | -0.106  | 0.537          |
|                | EPA     | 0.0886  | 0.613         | 0.191   | 0.264          |
|                | ARA     | -0.0249 | 0.887         | 0.135   | 0.432          |
| <i>cpt1a1b</i> | DHA     | 0.0966  | 0.581         | -0.455  | <b>0.00531</b> |
|                | EPA     | 0.103   | 0.555         | 0.405   | <b>0.0143</b>  |
|                | ARA     | 0.0185  | 0.916         | -0.118  | 0.495          |
| <i>cpt1a2a</i> | DHA     |         |               | -0.243  | 0.153          |
|                | EPA     |         |               | 0.219   | 0.199          |
|                | ARA     |         |               | -0.0954 | 0.580          |
| <i>cpt1a2b</i> | DHA     | 0.0482  | 0.783         | -0.370  | 0.0263         |
|                | EPA     | 0.211   | 0.224         | 0.247   | 0.146          |
|                | ARA     | 0.0178  | 0.919         | -0.184  | 0.284          |
| <i>cpt1b1a</i> | DHA     | -0.138  | 0.430         | 0.418   | <b>0.0113</b>  |
|                | EPA     | 0.420   | <b>0.0120</b> | -0.458  | <b>0.00494</b> |
|                | ARA     | -0.188  | 0.280         | 0.142   | 0.409          |
| <i>cpt1b1b</i> | DHA     | 0.125   | 0.473         | 0.0363  | 0.833          |
|                | EPA     | 0.127   | 0.467         | -0.0282 | 0.870          |
|                | ARA     | 0.0293  | 0.867         | 0.0499  | 0.772          |
| <i>alox5a</i>  | DHA     | 0.173   | 0.321         | 0.210   | 0.220          |
|                | EPA     | -0.170  | 0.328         | -0.191  | 0.264          |
|                | ARA     | 0.0334  | 0.849         | -0.0420 | 0.808          |
| <i>cox1a</i>   | DHA     | 0.174   | 0.318         | -0.164  | 0.340          |
|                | EPA     | 0.130   | 0.455         | 0.251   | 0.139          |
|                | ARA     | 0.145   | 0.406         | 0.123   | 0.476          |
|                | 16:0    | 0.0439  | 0.802         | 0.0655  | 0.704          |
|                | 18:0    | 0.317   | 0.0638        | 0.235   | 0.169          |

**Supplementary Table S2.** Correlation analyses (Pearson correlation coefficient, R) comparing relationships among Table 3. and n-6 PUFA in the diet.

| Transcript     | Diet FA | Liver     |                  | Muscle    |                  |
|----------------|---------|-----------|------------------|-----------|------------------|
|                |         | Pearson R | p-Value          | Pearson R | p-Value          |
| <i>elovl2</i>  | DHA     | -0.069    | 0.696            |           |                  |
|                | EPA     | -0.014    | 0.937            |           |                  |
|                | ARA     | -0.030    | 0.864            |           |                  |
|                | ALA     | 0.128     | 0.463            |           |                  |
|                | LNA     | 0.097     | 0.577            |           |                  |
| <i>elovl5a</i> | DHA     | 0.306     | 0.074            | -0.210    | 0.218            |
|                | EPA     | -0.171    | 0.326            | 0.033     | 0.848            |
|                | ARA     | -0.136    | 0.435            | -0.004    | 0.981            |
|                | ALA     | -0.161    | 0.355            | 0.262     | 0.122            |
|                | LNA     | -0.043    | 0.805            | 0.172     | 0.316            |
| <i>elovl5b</i> | DHA     | 0.120     | 0.493            |           |                  |
|                | EPA     | -0.078    | 0.654            |           |                  |
|                | ARA     | -0.067    | 0.704            |           |                  |
|                | ALA     | -0.043    | 0.806            |           |                  |
|                | LNA     | 0.002     | 0.990            |           |                  |
| <i>fadsd5</i>  | DHA     | 0.233     | 0.179            | -0.055    | 0.751            |
|                | EPA     | -0.191    | 0.271            | 0.125     | 0.469            |
|                | ARA     | -0.175    | 0.315            | 0.134     | 0.437            |
|                | ALA     | -0.015    | 0.932            | -0.140    | 0.416            |
|                | LNA     | 0.070     | 0.690            | -0.152    | 0.375            |
| <i>fadsd6a</i> | DHA     | -0.054    | 0.760            | -0.288    | 0.088            |
|                | EPA     | 0.058     | 0.740            | 0.288     | 0.089            |
|                | ARA     | 0.057     | 0.746            | 0.276     | 0.104            |
|                | ALA     | -0.022    | 0.902            | -0.075    | 0.665            |
|                | LNA     | -0.040    | 0.820            | -0.175    | 0.307            |
| <i>fadsd6b</i> | DHA     | -0.245    | 0.156            | -0.210    | 0.240            |
|                | EPA     | 0.035     | 0.840            | -0.047    | 0.783            |
|                | ARA     | -0.009    | 0.960            | -0.096    | 0.578            |
|                | ALA     | 0.309     | 0.071            | 0.393     | <b>0.018</b>     |
|                | LNA     | 0.206     | 0.235            | 0.299     | 0.077            |
| <i>acox1</i>   | DHA     | -0.179    | 0.304            | -0.171    | 0.320            |
|                | EPA     | 0.218     | 0.209            | 0.234     | 0.170            |
|                | ARA     | 0.216     | 0.212            | 0.237     | 0.164            |
| <i>cpt1a1a</i> | DHA     | 0.030     | 0.865            | -0.413    | <b>0.012</b>     |
|                | EPA     | 0.076     | 0.663            | 0.184     | 0.284            |
|                | ARA     | 0.095     | 0.588            | 0.130     | 0.451            |
| <i>cpt1a1b</i> | DHA     | -0.319    | 0.062            | -0.558    | <b>&lt;0.001</b> |
|                | EPA     | 0.271     | 0.116            | 0.468     | <b>0.004</b>     |
|                | ARA     | 0.249     | 0.148            | 0.431     | <b>0.009</b>     |
| <i>cpt1a2a</i> | DHA     |           |                  | -0.432    | <b>0.009</b>     |
|                | EPA     |           |                  | 0.268     | 0.114            |
|                | ARA     |           |                  | 0.224     | 0.189            |
| <i>cpt1a2b</i> | DHA     | -0.161    | 0.355            | -0.408    | <b>0.014</b>     |
|                | EPA     | 0.270     | 0.117            | 0.304     | 0.071            |
|                | ARA     | 0.281     | 0.102            | 0.271     | 0.110            |
| <i>cpt1b1a</i> | DHA     | -0.632    | <b>&lt;0.001</b> | 0.409     | <b>0.013</b>     |
|                | EPA     | 0.530     | <b>0.001</b>     | -0.411    | <b>0.013</b>     |
|                | ARA     | 0.486     | <b>0.003</b>     | -0.395    | <b>0.017</b>     |
| <i>cpt1b1b</i> | DHA     | -0.039    | 0.825            | -0.087    | 0.615            |
|                | EPA     | 0.208     | 0.230            | 0.026     | 0.878            |

|               |     |        |              |        |              |
|---------------|-----|--------|--------------|--------|--------------|
|               | ARA | 0.234  | 0.176        | 0.013  | 0.939        |
| <i>alox5a</i> | DHA | 0.284  | 0.099        | 0.407  | <b>0.014</b> |
|               | EPA | -0.074 | 0.672        | -0.216 | 0.207        |
|               | ARA | -0.028 | 0.872        | -0.168 | 0.327        |
| <i>cox1a</i>  | DHA | -0.484 | <b>0.003</b> | -0.440 | <b>0.007</b> |
|               | EPA | 0.183  | 0.292        | 0.239  | 0.160        |
|               | ARA | 0.114  | 0.514        | 0.189  | 0.271        |
